# Supplementary material
Source: PubMed Central journal article supplement (PMC4014844)
Supplement: supp_blood-2013-10-533398_blood-2013-10-533398-1.pdf [file supp_blood-2013-10-533398_blood-2013-10-533398-1.pdf]

## Supplemental Tables and Figures

### Supplemental Table 1: Demographics of the MDS Patient Cohort

| Variables                                  | No. of Patients (%) |
|--------------------------------------------|---------------------|
| <b>Sex</b>                                 |                     |
| Male                                       | 40 (60%)            |
| Female                                     | 27 (40%)            |
| <b><sup>a</sup>Age (years)</b>             |                     |
|                                            | 47 (19-74)          |
| <b>Ethnicity</b>                           |                     |
| Caucasian                                  | 62 (93%)            |
| African-American                           | 2 (3%)              |
| Hispanic                                   | 2 (3%)              |
| Other                                      | 1 (1%)              |
| <b>FAB Subtype</b>                         |                     |
| RAEB-T                                     | 10 (15%)            |
| RAEB                                       | 24 (36%)            |
| RARS                                       | 8 (12%)             |
| RA                                         | 9 (13%)             |
| <sup>b</sup> Other                         | 16 (24%)            |
| <b><sup>c</sup>Karyotype (IPSS)</b>        |                     |
| Favorable                                  | 24 (36%)            |
| Intermediate                               | 9 (14%)             |
| Poor                                       | 15 (22%)            |
| Unknown                                    | 19 (28%)            |
| <b><sup>d</sup>Blast Percentage (IPSS)</b> |                     |
| >5%                                        | 35 (52%)            |
| 5 - 10%                                    | 14 (21%)            |
| 11 - 20%                                   | 3 (4%)              |
| ≥21%                                       | 5 (8%)              |
| Unknown                                    | 10 (15%)            |
| <b><sup>e</sup>MDS Status</b>              |                     |
| Lower Risk                                 | 24 (36%)            |
| Higher Risk                                | 41 (61%)            |
| Unknown                                    | 2 (3%)              |

Abbreviations: FAB: French-American-British classification; RAEB-T: Refractory anemia with excess blasts in transformation; RAEB: Refractory anemia with excess blasts; RARS: Refractory anemia with ringed sideroblasts; RA: Refractory anemia; IPSS: International prognosis scoring system.

<sup>a</sup>Median (range) age at date of transplant

<sup>b</sup>Other: Paroxysmal nocturnal hemoglobinuria; Polycythemia vera; Essential thrombocythemia; Myelofibrosis with myeloid metaplasia; Myelofibrosis or myelosclerosis; Myelodysplasia or myeloproliferative disorder.

<sup>c</sup>Favorable: normal karyotype, isolated -Y, del(5q) or del(20q); Intermediate: other abnormalities; Poor: complex (≥3 abnormalities) or chromosome 7 anomalies.

<sup>d</sup>Blast percentage at date of transplant

<sup>e</sup>Lower Risk: RA or RARS; Higher Risk: RAEB, RAEB-T or CMML. Data regarding specific cell counts were not available, thus we were unable to determine the overall IPSS scores

**Supplemental Table 2: MDS cell population frequencies and CD16xCD33 BiKE-induced MDS NK cell function stratified by blast percentage (IPSS)**

|                                 | <sup>a</sup> <b>Blast Percentage (IPSS)</b> |                 |                 |               |                   |
|---------------------------------|---------------------------------------------|-----------------|-----------------|---------------|-------------------|
|                                 | <5%<br>(n=35)                               | 5-10%<br>(n=14) | 11-20%<br>(n=3) | ≥21%<br>(n=5) | Unknown<br>(n=10) |
| % NK cells                      | 2 ± 0.3%                                    | 3 ± 1%          | 0.2 ± 0.1%      | 2 ± 1%        | 1 ± 0.3%          |
| % CD33 <sup>+</sup>             | 28 ± 3%                                     | 29 ± 6%         | 56 ± 12%        | 23 ± 7%       | 28 ± 7%           |
| % MDSC                          | 21 ± 3%                                     | 23 ± 4%         | 38 ± 9%         | 20 ± 6%       | 14 ± 3%           |
| <b><sup>b</sup>PBMC Alone</b>   |                                             |                 |                 |               |                   |
| % CD107a <sup>+</sup>           | 38 ± 3%                                     | 33 ± 5%         | 33 ± 18%        | 30 ± 6%       | 42 ± 4%           |
| % TNF-α <sup>+</sup>            | 4 ± 1%                                      | 5 ± 2%          | 5 ± 4%          | 6 ± 4%        | 4 ± 1%            |
| % IFN-γ <sup>+</sup>            | 5 ± 1%                                      | 3 ± 0.4%        | 7 ± 3%          | 4 ± 1%        | 2 ± 1%            |
| <b><sup>c</sup>PBMC + HL-60</b> |                                             |                 |                 |               |                   |
| % CD107a <sup>+</sup>           | 42 ± 2%                                     | 42 ± 4%         | 34 ± 17%        | 46 ± 3%       | 45 ± 4%           |
| % TNF-α <sup>+</sup>            | 11 ± 2%                                     | 12 ± 2%         | 13 ± 8%         | 17 ± 4%       | 16 ± 2%           |
| % IFN-γ <sup>+</sup>            | 14 ± 2%                                     | 13 ± 2%         | 9 ± 5%          | 23 ± 6%       | 18 ± 3%           |

<sup>a</sup>Blast percentage at date of transplant

<sup>b</sup>CD16xCD33 BiKE induced MDS-NK cell function in the absence of HL-60 targets

<sup>c</sup>CD16xCD33 BiKE induced MDS-NK cell function in the presence of HL-60 targets

## Supplemental Figure 1

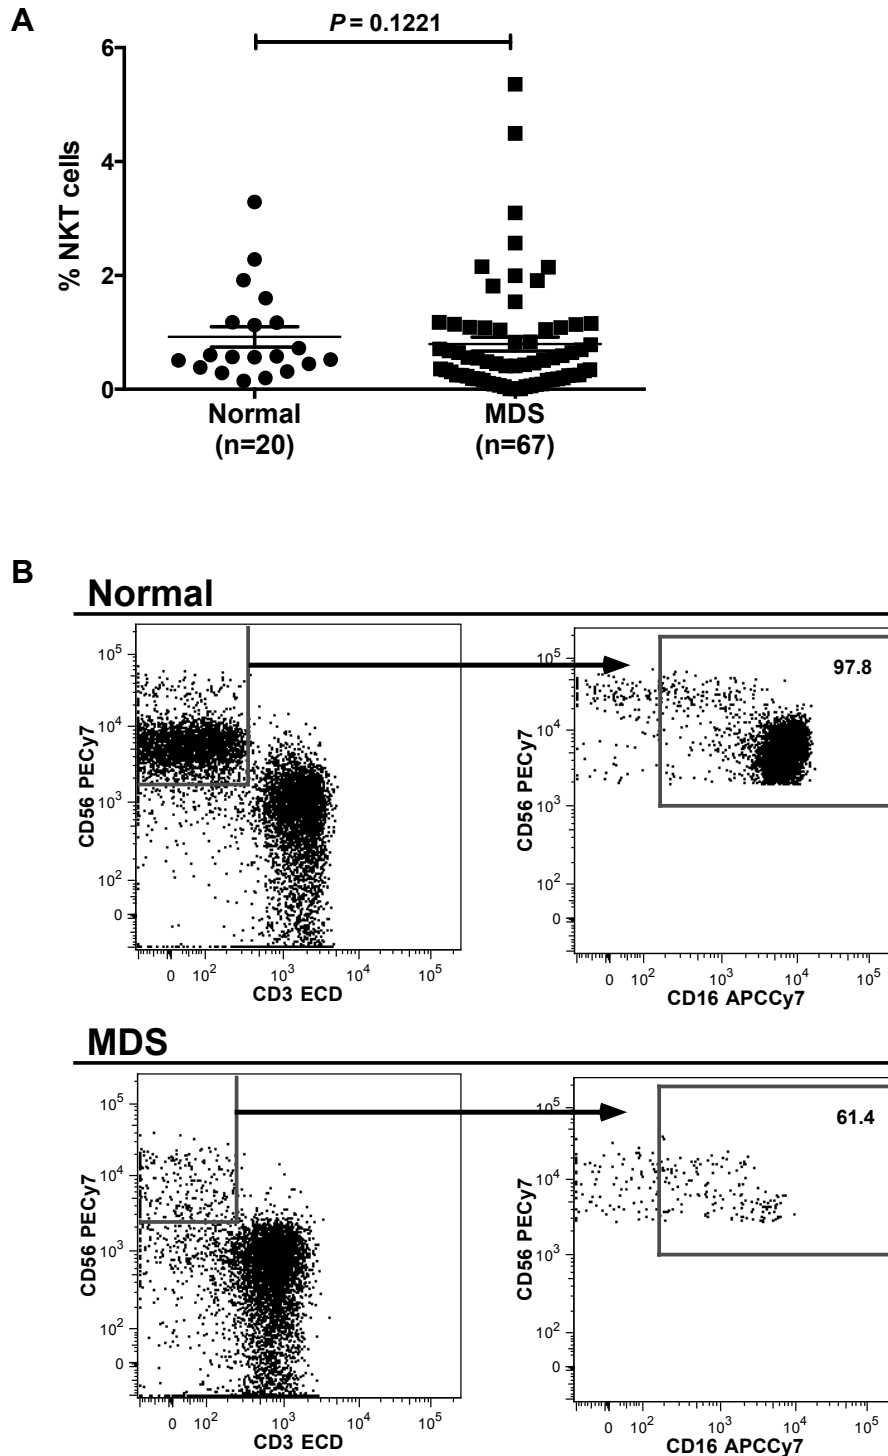

**Supplemental Figure 1: NKT cell frequency and NK cell CD16 expression among MDS patients.** (A) Percent of CD56<sup>+</sup>/CD3<sup>+</sup> NKT cells (normalized to all cell fraction based on the FSC/SSC gate excluding debris). (B) Normal donor and MDS-NK cells were stained with anti-CD45, anti-CD7, anti-CD56, anti-CD3 and anti-CD16 mAb and analyzed by flow cytometry. Representative flow cytometry plots from one normal donor (#14) and one higher risk MDS patient (#31) of percent of CD16<sup>+</sup> NK cells are shown.

## Supplemental Figure 2

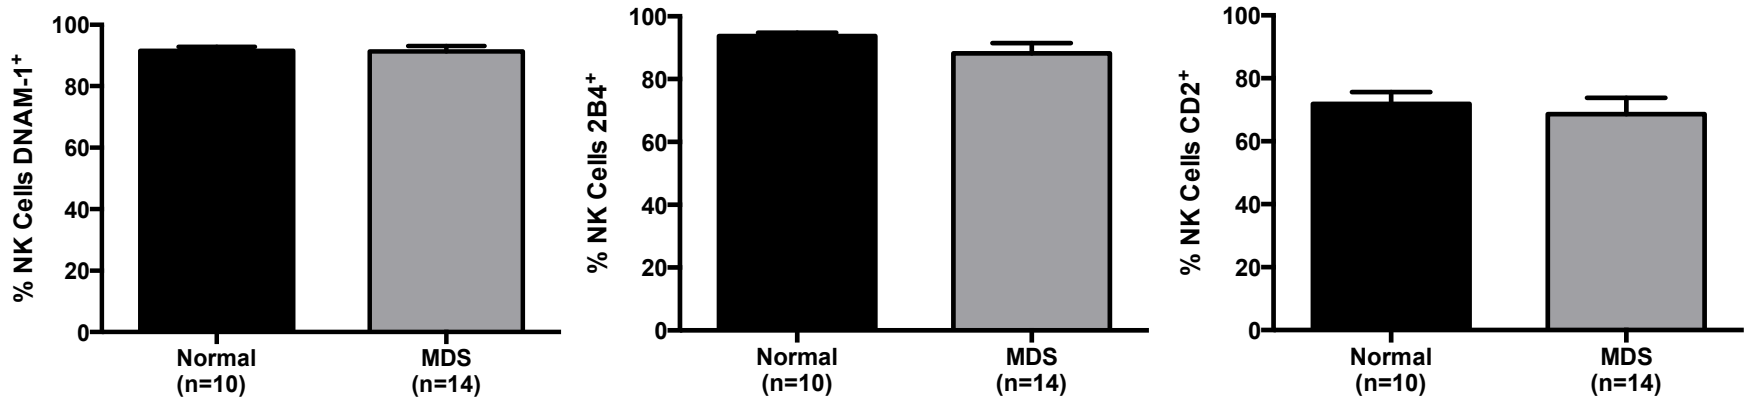

**Supplemental Figure 2: DNAM-1, 2B4 and CD2 MDS-NK cell receptor expression.** Normal donor and MDS-NK cells were stained with anti-CD45, anti-CD7, anti-CD56, anti-CD3, anti-DNAM-1, anti-2B4 and anti-CD2 mAb and surface receptor expression of DNAM-1, 2B4 and CD2 on NK cells were evaluated by flow cytometry.

### Supplemental Figure 3

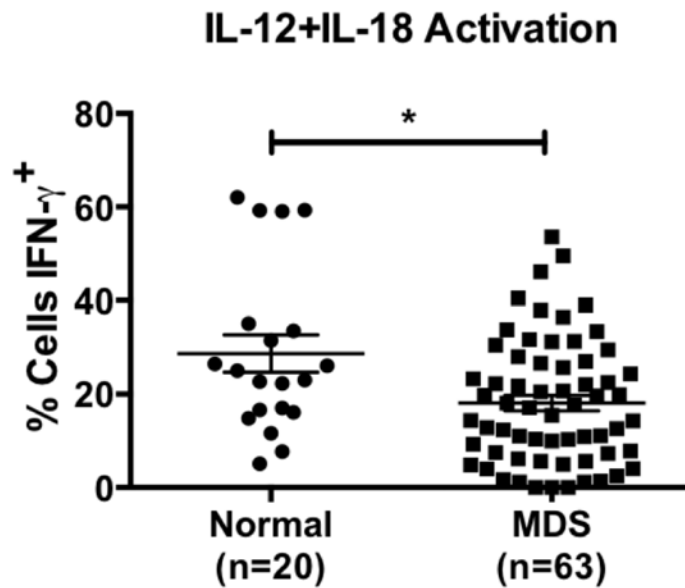

**Supplemental Figure 3: IFN- $\gamma$  production of MDS-NK cells is lower compared to normal donors after IL-12 and IL-18 activation.** PBMC from normal donors and MDS patients were stimulated overnight with IL-12 (10ng/mL) and IL-18 (100ng/mL) and NK cell intracellular IFN- $\gamma$  production was evaluated via FACS analysis (\* $P < 0.05$ ).

## Supplemental Figure 4

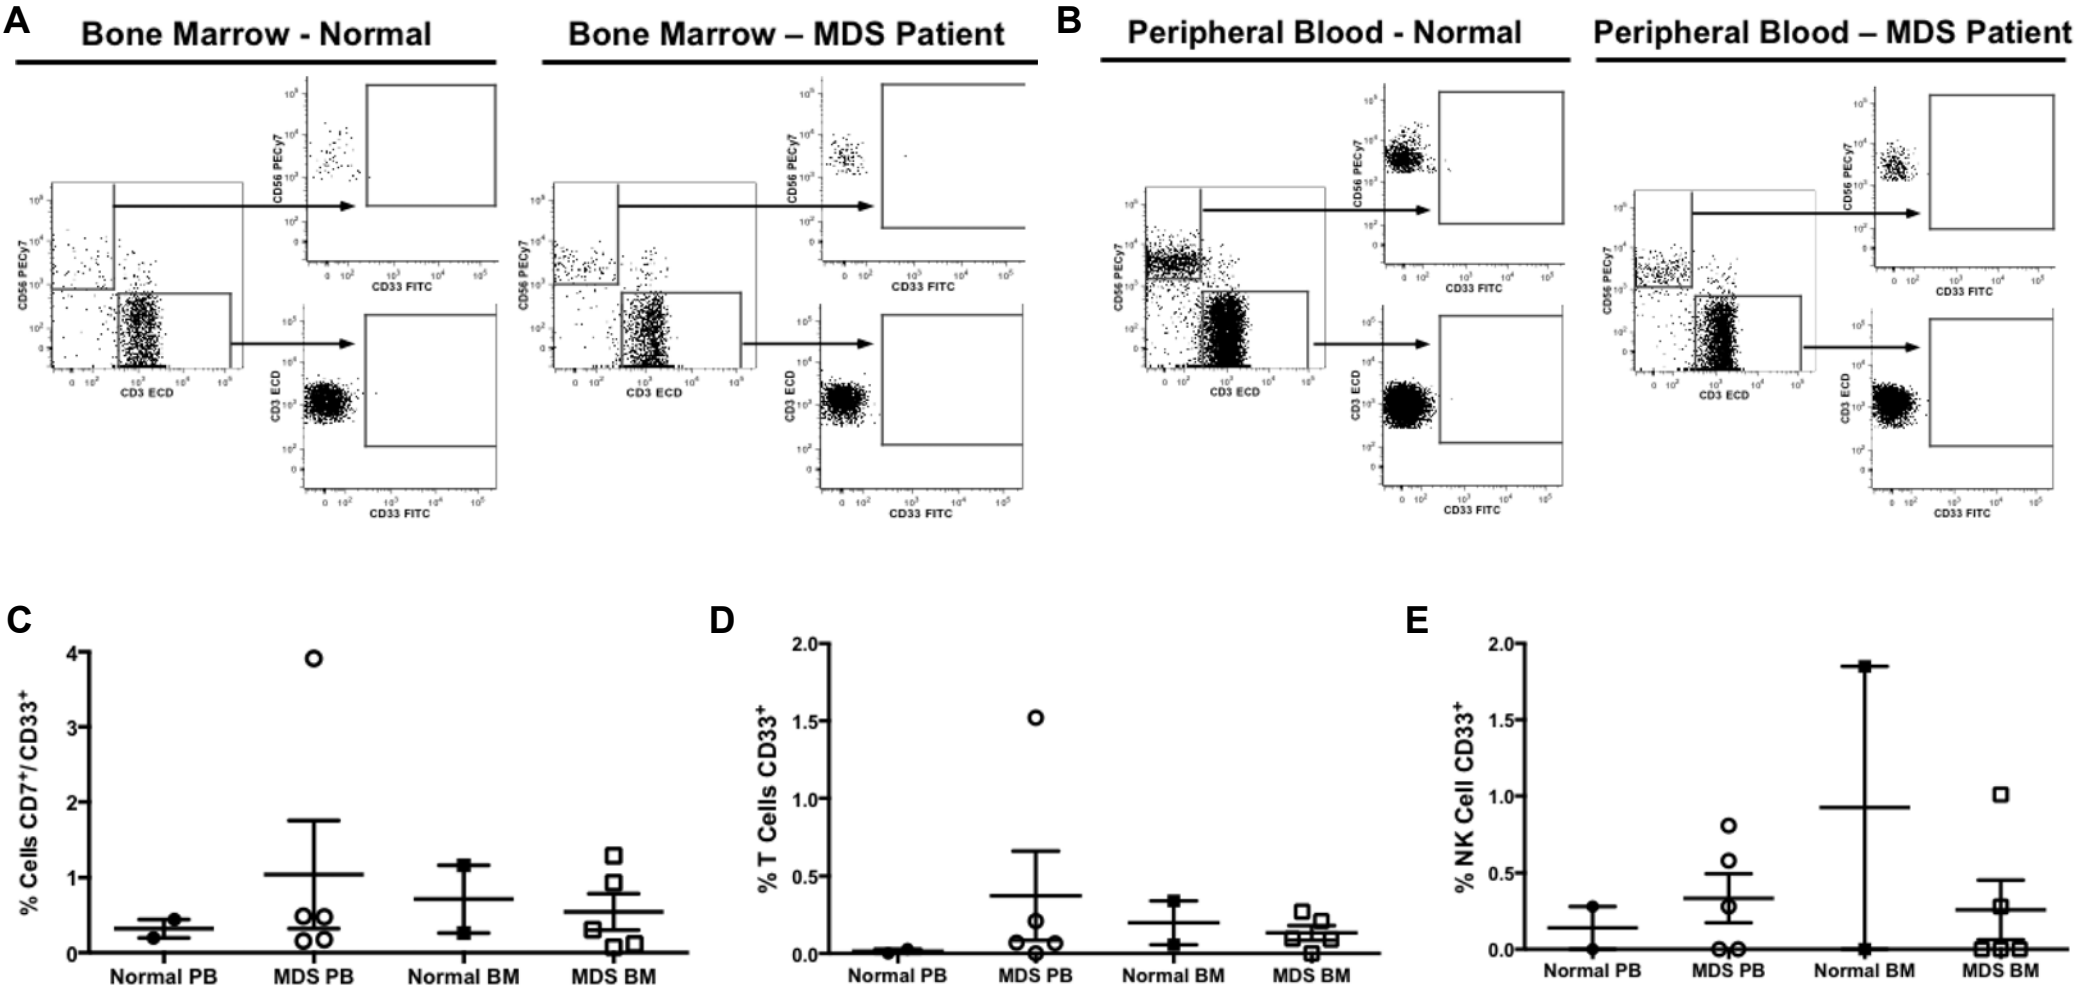

**Supplemental Figure 4: CD33 Expression on lymphocyte populations.** Bone marrow (BM) and peripheral blood (PB) from normal donors and MDS patients were stained with anti-CD45, anti-CD7, anti-CD56, anti-CD3 and anti-CD33 and CD33 expression was evaluated by flow cytometry on CD7<sup>+</sup>, T and NK cell populations. Flow cytometry plots are representative of one normal donor and one MDS patient and show CD33 expression on (A) CD56<sup>-</sup>/CD3<sup>+</sup> T cells and (B) CD56<sup>+</sup>/CD3<sup>-</sup> NK cells. Aggregate data for CD33 expression on (C) CD7<sup>+</sup> lymphocytes, (D) T cells and (E) NK cells from normal donors (n=2) and MDS patients (n=5) from BM and PB are shown.

## Supplemental Figure 5

### A Normal Donor

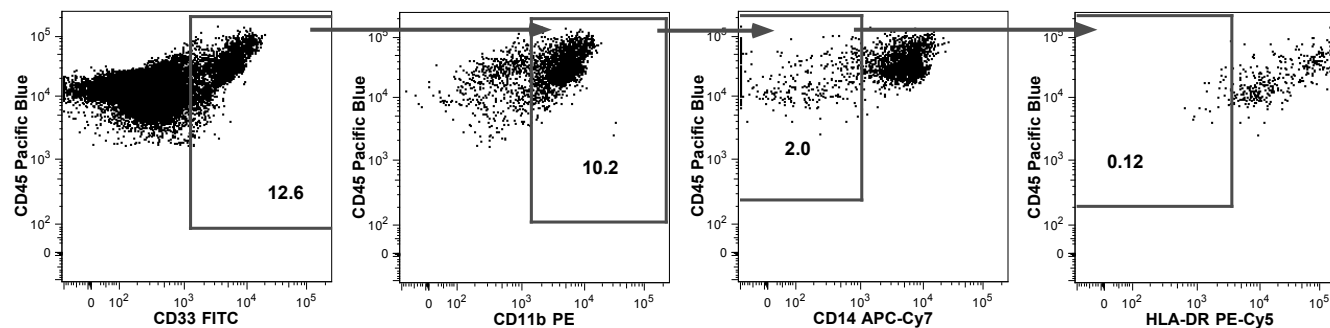

### B MDS Patient

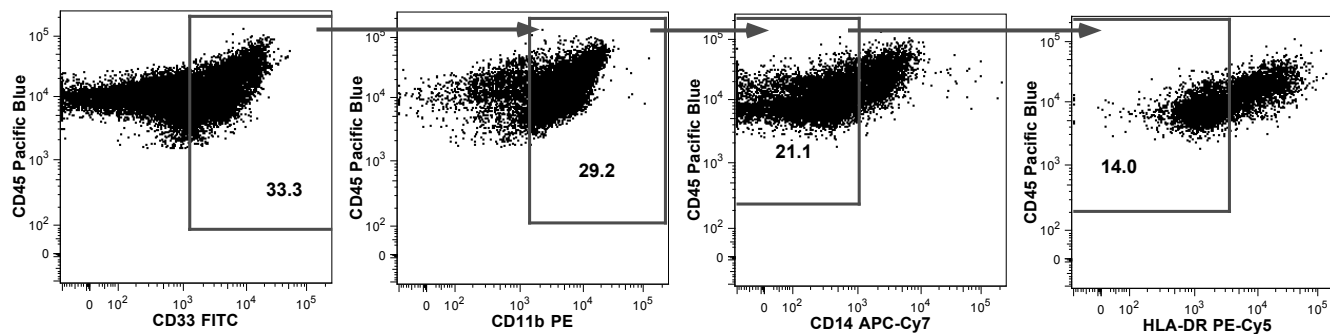

**Supplemental Figure 5: MDSC gating strategy.** PBMC from normal donors and MDS patients were stained with anti-CD45, anti-CD33, anti-CD11B, anti-CD14 and anti-HLA-DR mAbs. (A-B) Gating strategy for the evaluation of MDSC population in normal donors (A) and MDS patients (B). Plots are representative from one normal donor (#3 of 20) and one higher risk MDS patient (#25 of 67) and gate frequency indicates population percent normalized to the all cell fraction based on the FSC/SSC gate excluding debris.

## Supplemental Figure 6

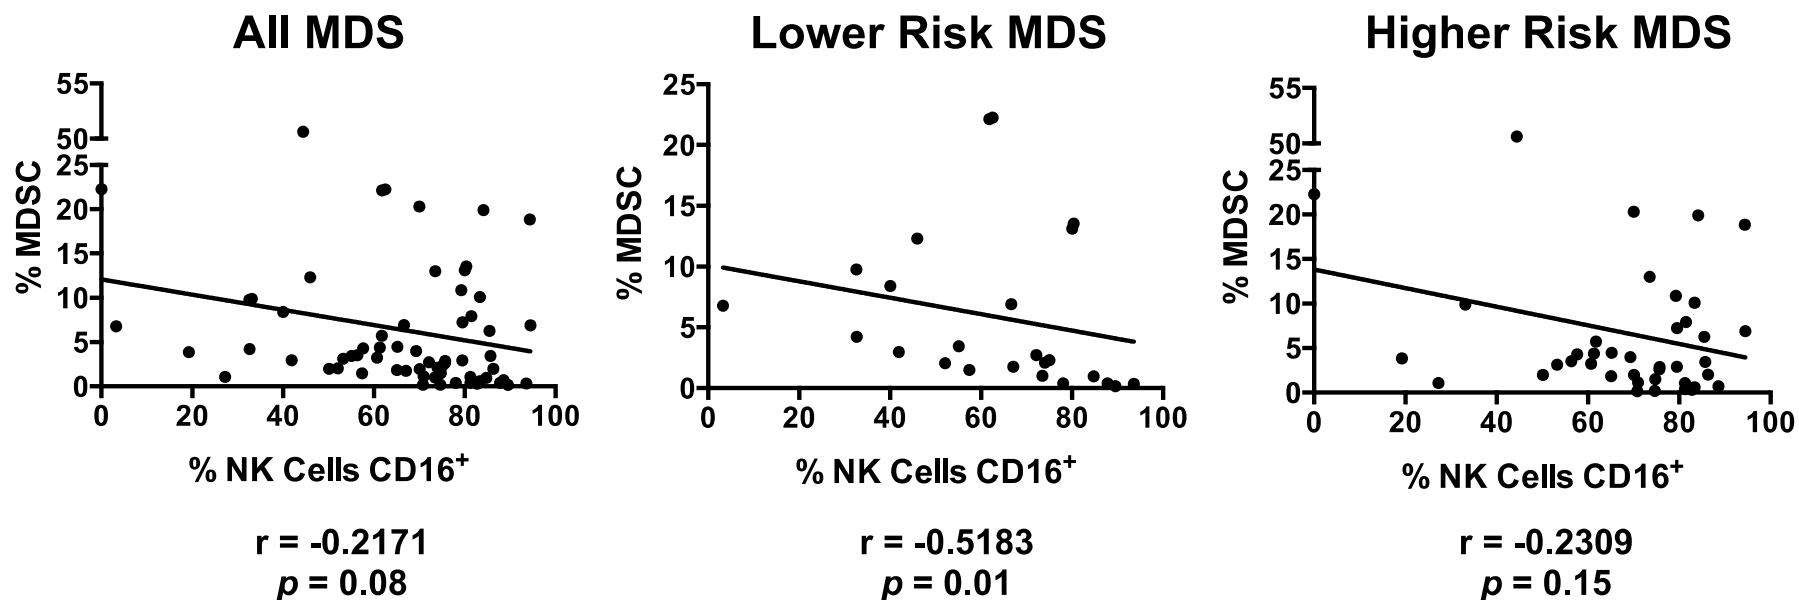

**Supplemental Figure 6: MDS-NK cell CD16 expression negatively correlates with MDS-MDSC frequency.** PBMC from MDS patients were stained with anti-CD45, anti-CD7, anti-CD56, anti-CD3, anti-CD16, anti-CD33, anti-CD11b, anti-CD14 and anti-HLA-DR mAbs. The correlations between % MDSC (normalized to all cell fraction excluding debris) and % NK cells CD16<sup>+</sup> among all MDS patients, lower risk MDS patients and higher risk MDS patients are presented. Correlation coefficients ( $r$ ) and statistical significance are indicated in the figure.



Supplemental Figure 7

A

T Cell Proliferation

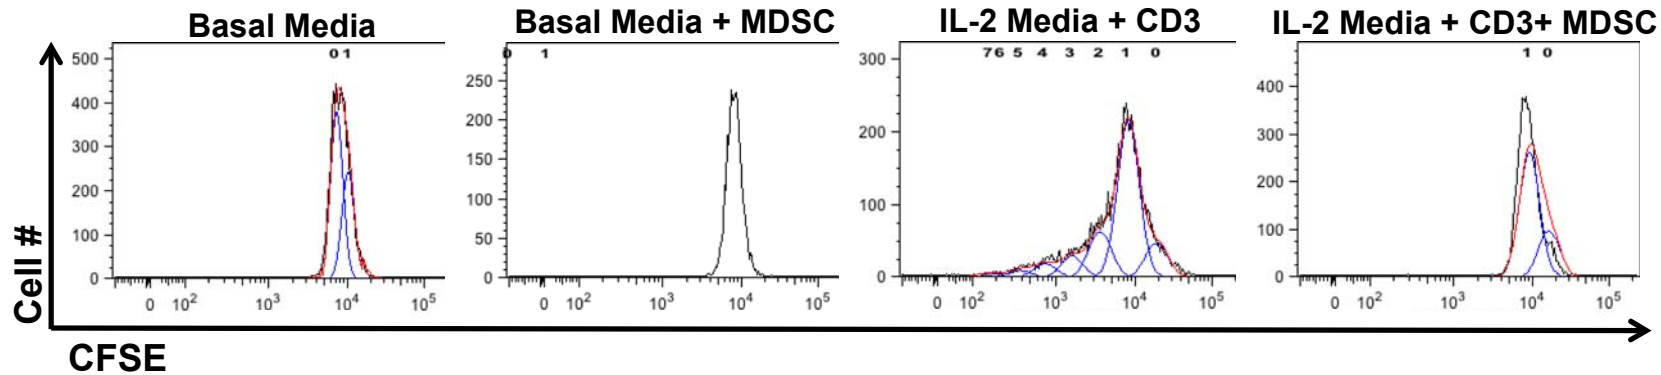

B

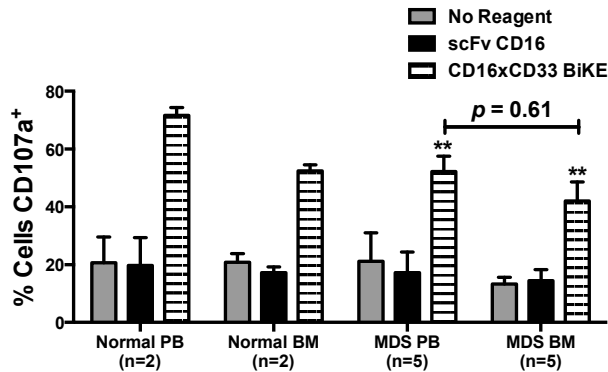

C

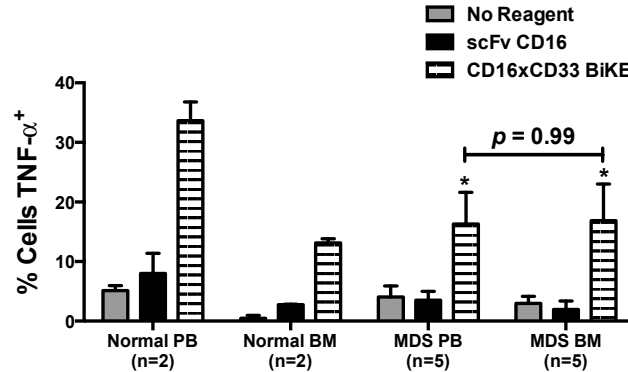

D

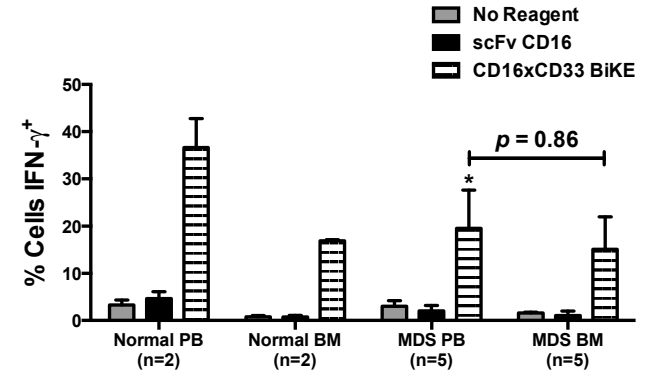

**Supplemental Figure 7: CD16xCD33 BiKE enhances peripheral blood and bone marrow NK cell function against HL-60 targets.** (A) CFSE-labeled T cells were cultured for 5 days in basal medium, medium supplemented with 100U/mL IL-2 and CD3 bead activation in the presence or absence (E:T ratio = 1:2) of cytokine-derived MDSC from normal PBMC and proliferation was evaluated via FACS analysis. Histogram plots represent one of six normal donors. (B-D) Mononuclear cells from peripheral blood (PB) and bone marrow (BM) were isolated from normal donors (n=2) and MDS patients (n=5), coated with 10μg/mL of CD16xCD33 BiKE or scFv CD16 control, co-cultured with HL-60 targets and NK cell (B) CD107a expression and intracellular (C) TNF-α and (D) IFN-γ production were evaluated via FACS analysis (\*P<0.05, \*\*P<0.01).

## Supplemental Figure 8

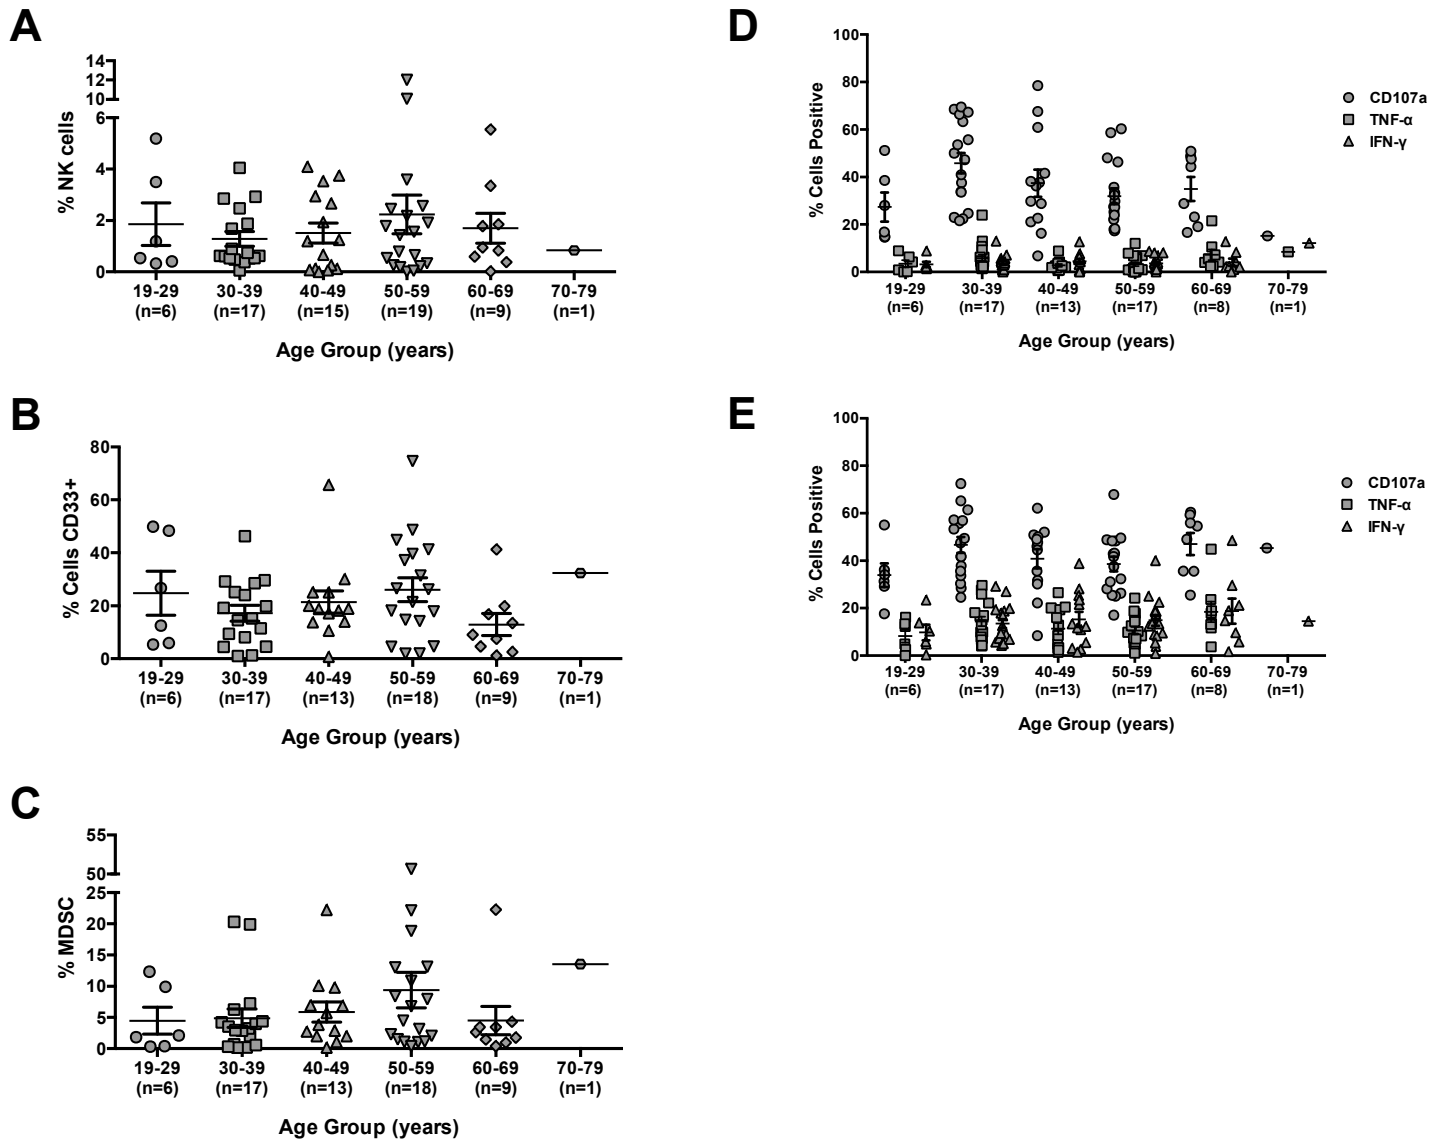

**Supplemental Figure 8: CD16xCD33 BiKE consistently enhances MDS-NK cell function among all age strata.** The percent of CD56<sup>+</sup>/CD3<sup>-</sup> MDS-NK cells (A), total CD33<sup>+</sup> cells (B) and MDS-MDSC (C) of the all cell fraction was stratified according to age groups (years). (D-E) CD16xCD33 BiKE-induced MDS-NK cell functions (degranulation (CD107a), intracellular TNF- $\alpha$  and IFN- $\gamma$  production) in the absence of HL-60 targets (D) and in the presence of HL-60 targets (E) were stratified according to age groups. Y-axis of graphs (D and E) represent the percent of NK cells positive for each function listed in graph legend.
